# Supplementary material
Source: Springer Nature journal article supplement (https://www.springermedizin.de/resource/supplementary/12936_2014_3278_MOESM10_ESM.pdf/9545484)
Supplement: MOESM10 [file 9545484]

| <i>Adherence</i> | Outcome assessment | Selection patients | Selection CHWs | Missing data | Other bias | <i>n</i> observations        |
|------------------|--------------------|--------------------|----------------|--------------|------------|------------------------------|
| Chanda 2011 (2x) | ?                  | +                  | ?              | +            | +          | 9847                         |
| Chinkhumba 2010  | ?                  | +                  | +              | +            | ?          | 1317                         |
| Elmardi 2009     | ?                  | ?                  | -              | ?            | +          | 30 CHWs                      |
| Hamer 2013       | +                  | +                  | +              | +            | +          | 975                          |
| Ishengoma 2011   | ?                  | +                  | ?              | +            | +          | 18213                        |
| Mubi 2011        | ?                  | +                  | +              | +            | +          | 1457                         |
| Mukanga 2011     | +                  | +                  | +              | ?            | +          | 182                          |
| Mukanga 2012     | +                  | +                  | +              | +            | +          | 525 (BF), 591 (Gh), 975 (Ug) |
| Ndiaye 2013      | +                  | ?                  | +              | +            | +          | 14554                        |
